# Supplementary material
Source: PubMed Central journal article supplement (PMC1924820)

**Supplemental Figure 1**

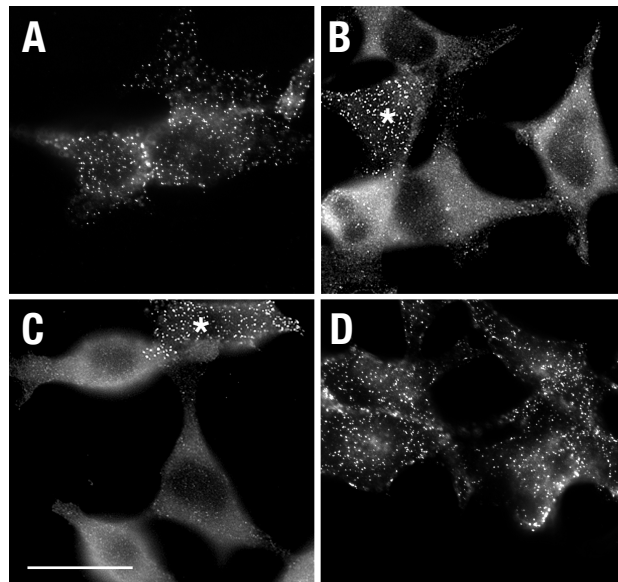

Supplement: mbc_E06-09-0831_1.pdf [file mbc_E06-09-0831_1.pdf]
